# Supplementary material for: Coagulation of colloidal particles with ferrate(vi)
Source: Royal Society of Chemistry journal article supplement (doi:10.1039/c8ew00048d), 2018-01-01
Supplement: c8ew00048d1.pdf [file c8ew00048d1.pdf]

## Supplementary Information

### Coagulation of Colloidal Particles with Ferrate(VI)

*Dongyu Lv<sup>†,‡</sup>, Lei Zheng<sup>‡</sup>, Huiqin Zhang<sup>‡,§</sup>, Yang Deng<sup>‡,\*</sup>*

<sup>†</sup>College of Chemistry and Chemical Engineering, Lanzhou University, Lanzhou, Gansu  
Province, 730000, China

<sup>‡</sup> Department of Earth and Environmental Studies, Montclair State University, Montclair, New  
Jersey 07043, United States

<sup>§</sup> School of Civil Engineering, Architecture and Environment, Hubei University of Technology,  
Wuhan, Hubei Province, 430068, China

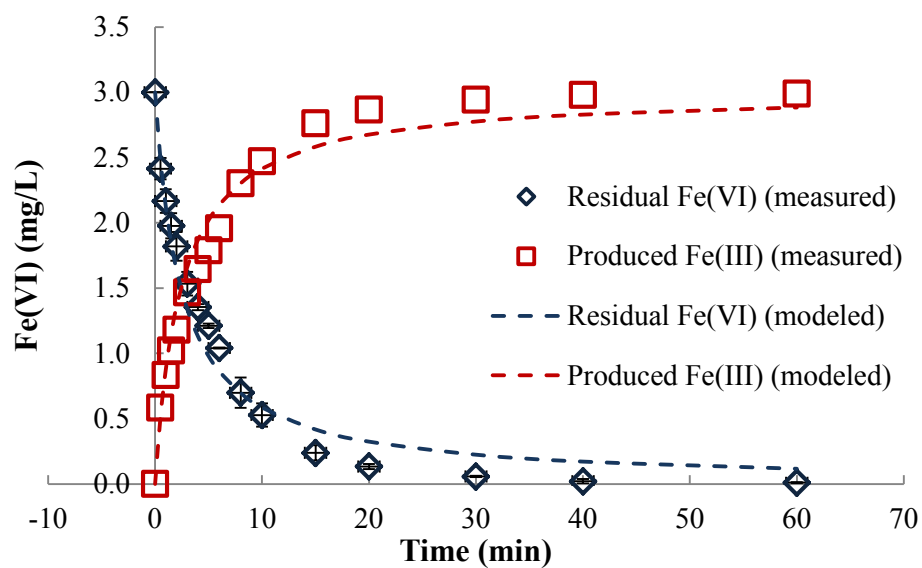

**Figure SI-1.** Residual Fe(III) and accumulated Fe(III) profiles during Fe(VI) decomposition in simulated natural water (pH 7.5; Fe(VI) = 3.0 mg/L; and initial turbidity = 25.00 NTU) (scattered symbols and dash lines represent measured and modeled data, respectively.)

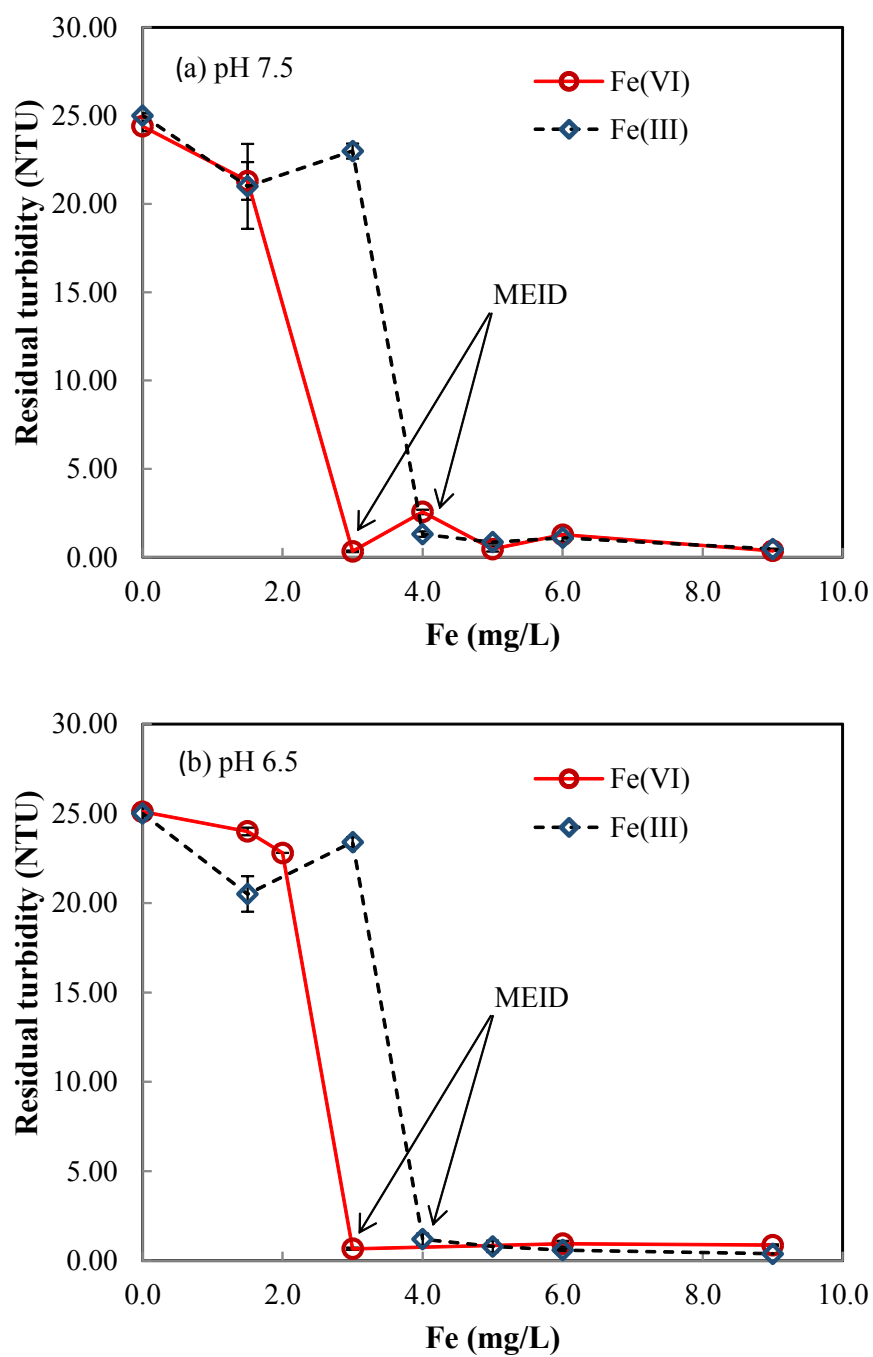

**Figure SI-2.** Typical patterns of residual turbidity as a function of Fe(VI) or Fe(III) dose: (a) pH 7.5; and (b) pH 6.5 (initial turbidity = 25.00 NTU)
